# Supplementary material for: Host specificity of Asian parasitoids for potential classical biological control of Drosophila suzukii
Source: J Pest Sci (2004). 2018 Jun 18;91(4):1241–50. doi: 10.1007/s10340-018-1003-z (PMC6063322; doi:10.1007/s10340-018-1003-z)
Supplement: Supplementary file 1 — Supplementary material 1 (PDF 40 kb) [file 10340_2018_1003_MOESM1_ESM.pdf]

Table 2. Proportion of ovipositing females, outcomes of oviposition, and measured parameters of the parasitism (success and encapsulation) per parasitoid species, origin, host and substrate.

| Parasitoid                              |                       |                        |                 | Outcomes of ovipositing females (%) |                                         |                  | Outcomes of parasitism (%) |                               |                                |                          |                         |
|-----------------------------------------|-----------------------|------------------------|-----------------|-------------------------------------|-----------------------------------------|------------------|----------------------------|-------------------------------|--------------------------------|--------------------------|-------------------------|
|                                         |                       | Host                   | Substrate       | No. of females tested               |                                         |                  |                            |                               |                                |                          |                         |
| Species                                 | Origin                |                        |                 |                                     | Proportion of Ovipositing Females (POF) | All encapsulated | At least one offspring     | Overall Parasitism Rate (OPR) | Apparent Parasitism Rate (APR) | Encapsulation Level (EL) | Encapsulation Rate (ER) |
| <i>Leptopilina heterotoma</i>           | Delémont, Switzerland | <i>D. melanogaster</i> | Artificial diet | 30                                  | 80.00                                   | 0.00             | 80.00                      | 47.56                         | 46.65                          | 0.92                     | 2.91                    |
|                                         |                       | <i>D. busckii</i>      | Artificial diet | 30                                  | 0.00                                    | 0.00             | 0.00                       | 0.00                          | 0.00                           | 0.00                     | -                       |
|                                         |                       | <i>D. subobscura</i>   | Artificial diet | 30                                  | 45.45                                   | 0.00             | 45.45                      | 30.41                         | 30.41                          | 0.00                     | 0.00                    |
|                                         |                       | <i>D. immigrans</i>    | Artificial diet | 30                                  | 16.67                                   | 6.67             | 10.00                      | 1.86                          | 0.87                           | 0.99                     | 56.00                   |
|                                         |                       | <i>D. suzukii</i>      | Artificial diet | 30                                  | 73.33                                   | 70.00            | 3.33                       | 29.94                         | 0.33                           | 29.60                    | 99.43                   |
| <i>Leptopilina japonica</i>             | Beijing, China        | <i>D. melanogaster</i> | Artificial diet | 30                                  | 51.85                                   | 0.00             | 51.85                      | 36.26                         | 36.26                          | 0.00                     | 0.00                    |
|                                         |                       | <i>D. busckii</i>      | Artificial diet | 30                                  | 4.00                                    | 4.00             | 0.00                       | 0.05                          | 0.00                           | 0.05                     | 100.00                  |
|                                         |                       | <i>D. subobscura</i>   | Artificial diet | 30                                  | 7.41                                    | 0.00             | 7.41                       | 4.32                          | 4.32                           | 0.00                     | 0.00                    |
|                                         |                       | <i>D. immigrans</i>    | Artificial diet | 30                                  | 6.67                                    | 3.33             | 3.33                       | 0.66                          | 0.12                           | 0.54                     | 75.00                   |
|                                         |                       | <i>D. suzukii</i>      | Artificial diet | 30                                  | 63.33                                   | 3.33             | 60.00                      | 35.15                         | 35.07                          | 0.08                     | 5.26                    |
| <i>Leptopilina japonica</i>             | Kunming, China        | <i>D. melanogaster</i> | Artificial diet | 30                                  | 40.00                                   | 0.00             | 40.00                      | 21.97                         | 21.97                          | 0.00                     | 0.00                    |
|                                         |                       | <i>D. busckii</i>      | Artificial diet | 30                                  | 0.00                                    | 0.00             | 0.00                       | 0.00                          | 0.00                           | 0.00                     | -                       |
|                                         |                       | <i>D. subobscura</i>   | Artificial diet | 30                                  | 3.70                                    | 0.00             | 3.70                       | 2.78                          | 2.78                           | 0.00                     | 0.00                    |
|                                         |                       | <i>D. immigrans</i>    | Artificial diet | 30                                  | 7.14                                    | 7.14             | 0.00                       | 0.26                          | 0.00                           | 0.26                     | 100.00                  |
|                                         |                       | <i>D. suzukii</i>      | Artificial diet | 30                                  | 31.03                                   | 0.00             | 31.03                      | 15.00                         | 15.00                          | 0.00                     | 0.00                    |
| <i>Asobara japonica</i>                 | Tokyo, Japan          | <i>D. melanogaster</i> | Artificial diet | 30                                  | 80.00                                   | 5.00             | 75.00                      | 54.94                         | 54.31                          | 0.63                     | 6.25                    |
|                                         |                       | <i>D. busckii</i>      | Artificial diet | 30                                  | 16.67                                   | 4.17             | 12.50                      | 3.12                          | 2.87                           | 0.25                     | 25.00                   |
|                                         |                       | <i>D. subobscura</i>   | Artificial diet | 30                                  | 71.43                                   | 4.76             | 66.67                      | 38.85                         | 38.74                          | 0.11                     | 6.67                    |
|                                         |                       | <i>D. immigrans</i>    | Artificial diet | 30                                  | 12.00                                   | 4.00             | 8.00                       | 2.26                          | 1.17                           | 1.09                     | 33.33                   |
|                                         |                       | <i>D. suzukii</i>      | Artificial diet | 30                                  | 85.71                                   | 0.00             | 85.71                      | 59.27                         | 58.08                          | 1.19                     | 2.08                    |
| <i>Ganaspis</i> cf. <i>brasiliensis</i> | Kunming, China        | <i>D. melanogaster</i> | Blended diet    | 30                                  | 64.29                                   | 7.14             | 57.14                      | 37.49                         | 35.02                          | 2.47                     | 14.78                   |
|                                         |                       | <i>D. busckii</i>      | Blended diet    | 60                                  | 0.00                                    | 0.00             | 0.00                       | 0.00                          | 0.00                           | 0.00                     | -                       |
|                                         |                       | <i>D. subobscura</i>   | Blended diet    | 30                                  | 7.14                                    | 0.00             | 7.14                       | 0.47                          | 0.36                           | 0.11                     | 25.00                   |
|                                         |                       | <i>D. immigrans</i>    | Blended diet    | 30                                  | 0.00                                    | 0.00             | 0.00                       | 0.00                          | 0.00                           | 0.00                     | -                       |
|                                         |                       | <i>D. hydei</i>        | Blended diet    | 30                                  | 3.33                                    | 3.33             | 0.00                       | 0.10                          | 0.00                           | 0.10                     | 100.00                  |
|                                         |                       | <i>D. suzukii</i>      | Blended diet    | 60                                  | 43.10                                   | 3.45             | 39.66                      | 18.61                         | 15.98                          | 2.63                     | 18.34                   |
|                                         |                       | <i>D. suzukii</i>      | Blueberry       | 60                                  | 74.00                                   | 8.00             | 66.00                      | 36.95                         | 32.46                          | 4.49                     | 15.09                   |
|                                         |                       | <i>C. capitata</i>     | Blended diet    | 30                                  | 0.00                                    | 0.00             | 0.00                       | 0.00                          | 0.00                           | 0.00                     | -                       |
|                                         |                       | <i>C. capitata</i>     | Blueberry       | 30                                  | 0.00                                    | 0.00             | 0.00                       | 0.00                          | 0.00                           | 0.00                     | -                       |
| <i>Ganaspis</i> cf. <i>brasiliensis</i> | Tokyo, Japan          | <i>D. melanogaster</i> | Blended diet    | 30                                  | 23.33                                   | 23.33            | 0.00                       | 0.96                          | 0.00                           | 0.96                     | 100.00                  |
|                                         |                       | <i>D. busckii</i>      | Blended diet    | 60                                  | 0.00                                    | 0.00             | 0.00                       | 0.00                          | 0.00                           | 0.00                     | -                       |
|                                         |                       | <i>D. subobscura</i>   | Blended diet    | 30                                  | 3.45                                    | 3.45             | 0.00                       | 0.43                          | 0.00                           | 0.43                     | 100.00                  |
|                                         |                       | <i>D. immigrans</i>    | Blended diet    | 30                                  | 0.00                                    | 0.00             | 0.00                       | 0.00                          | 0.00                           | 0.00                     | -                       |
|                                         |                       | <i>D. hydei</i>        | Blended diet    | 30                                  | 6.67                                    | 6.67             | 0.00                       | 0.61                          | 0.00                           | 0.61                     | 100.00                  |
|                                         |                       | <i>D. suzukii</i>      | Blended diet    | 60                                  | 10.00                                   | 8.33             | 1.67                       | 0.48                          | 0.16                           | 0.32                     | 85.00                   |
|                                         |                       | <i>D. suzukii</i>      | Blueberry       | 60                                  | 46.15                                   | 5.77             | 40.38                      | 21.20                         | 19.60                          | 1.60                     | 15.63                   |
|                                         |                       | <i>C. capitata</i>     | Blended diet    | 30                                  | 0.00                                    | 0.00             | 0.00                       | 0.00                          | 0.00                           | 0.00                     | -                       |
|                                         |                       | <i>C. capitata</i>     | Blueberry       | 30                                  | 0.00                                    | 0.00             | 0.00                       | 0.00                          | 0.00                           | 0.00                     | -                       |
| <i>Leptopilina japonica</i>             | Beijing, China        | <i>D. hydei</i>        | Blended diet    | 30                                  | 0.00                                    | 0.00             | 0.00                       | 0.00                          | 0.00                           | 0.00                     | -                       |
|                                         |                       | <i>D. suzukii</i>      | Blended diet    | 30                                  | 62.96                                   | 3.70             | 59.26                      | 33.29                         | 33.10                          | 0.19                     | 5.88                    |
|                                         |                       | <i>D. suzukii</i>      | Blueberry       | 30                                  | 61.90                                   | 0.00             | 61.90                      | 24.13                         | 24.13                          | 0.00                     | 0.00                    |
|                                         |                       | <i>C. capitata</i>     | Blended diet    | 30                                  | 0.00                                    | 0.00             | 0.00                       | 0.00                          | 0.00                           | 0.00                     | -                       |
|                                         |                       | <i>C. capitata</i>     | Blueberry       | 30                                  | 0.00                                    | 0.00             | 0.00                       | 0.00                          | 0.00                           | 0.00                     | -                       |
